# Supplementary material for: Mechanistic aspects of proton chain transfer in the green fluorescent protein : Part II. A comparison of minimal quantum chemical models
Source: Royal Society of Chemistry journal article supplement (doi:10.1039/b612760f), 2006-12-04
Supplement: b612760f.pdf [file b612760f.pdf]

# “Mechanistic Aspects of Proton Chain Transfer in the Green Fluorescent Protein. II: A Comparison of Minimal Quantum Chemical Models”

## Supplementary Material

Sufan Wang, Sean C Smith\*

*Centre for Computational Molecular Science, The University of Queensland, QLD  
4072,  
Brisbane, Australia*

### 1. The results for the three-step chain model with His-148 attached to the phenolic oxygen.

The differences between the model in Figure S1 (named model 1s) and the model 1b in Figure 1 is the His-148 function group added to the phenolic oxygen. With His-148 interacted with the phenolic oxygen, it can reduce the reaction barrier, and obviously, stabilize the anionic for the proton transfer process.

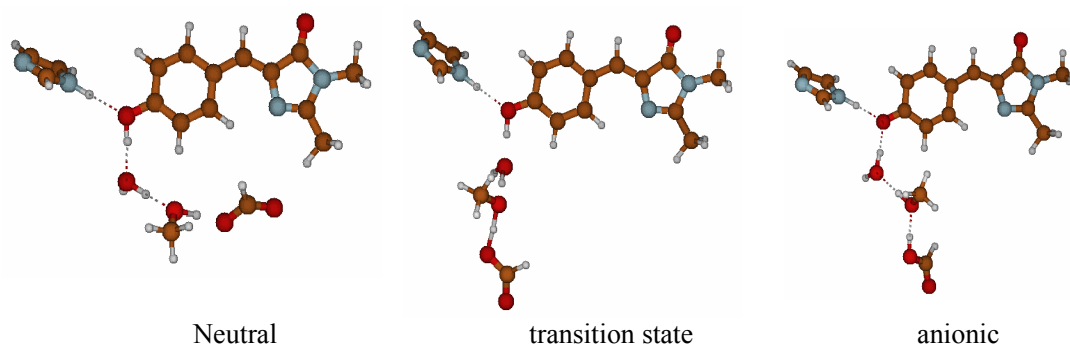

Figure S1: Stationary structures for the proton transfer in model 1s

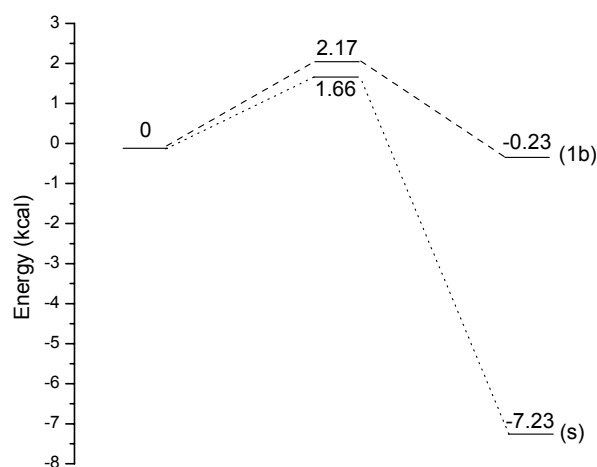

Figure S2: Potential energy profiles associated with the optimized stationary points for proton chain transfer in clusters 1b of Figure 1 and 1s of Figure S1. Energies in kcal.

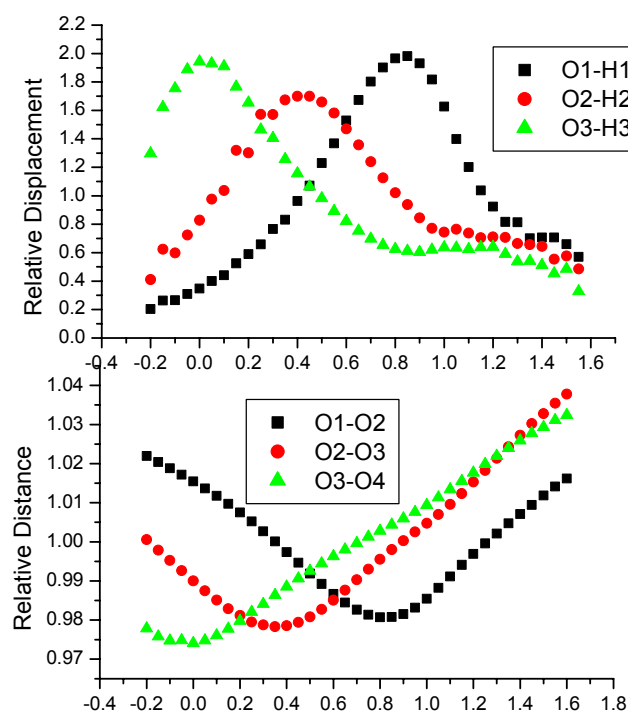

Figure S3: Plot of the relative displacement ( $D_{OH}$ ) parameter for each of the three protons in the proton wire and the corresponding relative separation ( $D_{OO}$ ) parameters as a function of reaction coordinate for model 1s of Figure S1. Squares represent the phenolic proton on the chromophore, circles the bridging water proton and triangles the bridging methanol proton.

## 2. Absolute energies for the stationary points, namely neutral forms (N), the transition states (TS) and Anionic forms (A). (in a.u.)

| System      | N             | TS            | A             |
|-------------|---------------|---------------|---------------|
| cluster 1b* | -1105.9854131 | -1105.9819493 | -1105.9887506 |
| cluster 1c  | -1145.307871  | -1145.306441  | -1145.314235  |
| cluster 1d  | -1299.171544  | -1299.162845  | -1299.1617131 |
| cluster 1e  | -1525.423283  | -1525.418196  | -1525.4311639 |
| cluster 1s  | -1332.237762  | -1332.235122  | -1332.249288  |

\* Further details for cluster 1b are to be found in reference 29.

## 3. The atomic coordinates for the stationary geometries, namely neutral forms (N) the transition states (TS) and Anionic forms (A).

### 1. the proton transfer reaction for cluster 1b

#### N-form

|   |           |          |           |
|---|-----------|----------|-----------|
| C | 1.752441  | 1.349924 | -0.592642 |
| C | 2.167923  | 2.658690 | -0.906876 |
| C | 1.200580  | 3.673213 | -1.038686 |
| C | -0.142933 | 3.381849 | -0.837670 |

|   |           |           |           |
|---|-----------|-----------|-----------|
| C | -0.577693 | 2.079764  | -0.493202 |
| C | 0.411587  | 1.071443  | -0.383889 |
| O | 3.465535  | 2.981012  | -1.091125 |
| H | 4.060100  | 2.214074  | -0.867285 |
| C | -1.985034 | 1.837388  | -0.260504 |
| C | -2.599658 | 0.687646  | 0.141564  |
| C | -4.059843 | 0.563257  | 0.373408  |
| N | -1.983282 | -0.538510 | 0.425083  |
| N | -4.194172 | -0.767547 | 0.793963  |
| C | -2.920318 | -1.355160 | 0.801763  |
| O | -4.985323 | 1.367551  | 0.254681  |
| C | -5.456692 | -1.373663 | 1.157285  |
| H | -6.230890 | -0.618144 | 1.003391  |
| H | -5.464018 | -1.684475 | 2.208167  |
| C | -2.697633 | -2.771914 | 1.208478  |
| H | -3.075057 | -2.951838 | 2.223335  |
| H | -5.675298 | -2.245309 | 0.530563  |
| H | -1.625704 | -3.001125 | 1.182860  |
| O | 5.115773  | 0.964030  | -0.376669 |
| H | 2.482443  | 0.551014  | -0.516759 |
| H | 4.736208  | 0.029476  | -0.430044 |
| H | 5.447793  | 1.057898  | 0.523815  |
| H | 1.527043  | 4.677815  | -1.290218 |
| H | 1.076268  | -2.307245 | -0.152194 |
| H | -0.879900 | 4.176382  | -0.936491 |
| H | -3.229285 | -3.460457 | 0.538313  |
| H | 0.109294  | 0.064381  | -0.126372 |
| H | -2.654409 | 2.683746  | -0.410043 |
| O | 2.698346  | -2.816422 | 0.947228  |
| C | 1.443901  | -2.917688 | 0.711556  |
| O | 0.605218  | -3.604267 | 1.320787  |
| O | 4.087105  | -1.419862 | -0.591761 |
| C | 4.621074  | -2.274463 | -1.582503 |
| H | 3.482545  | -1.978923 | 0.071739  |
| H | 5.259385  | -1.684926 | -2.252009 |
| H | 3.826659  | -2.738951 | -2.185313 |
| H | 5.229565  | -3.079019 | -1.142363 |

**TS**

|   |           |           |           |
|---|-----------|-----------|-----------|
| C | 1.202658  | -1.467747 | -0.004688 |
| C | 1.502708  | -2.844167 | -0.220517 |
| C | 0.414922  | -3.732612 | -0.443319 |
| C | -0.885712 | -3.269435 | -0.445183 |
| C | -1.197262 | -1.900530 | -0.229348 |

|   |           |           |           |
|---|-----------|-----------|-----------|
| C | -0.104307 | -1.016893 | -0.010062 |
| O | 2.727190  | -3.324755 | -0.220456 |
| H | 3.547022  | -2.583326 | -0.043699 |
| C | -2.571878 | -1.499489 | -0.246558 |
| C | -3.159066 | -0.273235 | -0.073024 |
| C | -4.617691 | -0.072434 | -0.132079 |
| N | -2.529193 | 0.957664  | 0.176988  |
| N | -4.754346 | 1.310685  | 0.093298  |
| C | -3.476723 | 1.843749  | 0.265918  |
| O | -5.559751 | -0.846748 | -0.322816 |
| C | -6.027241 | 1.996717  | 0.128762  |
| H | -6.797799 | 1.242227  | -0.047339 |
| H | -6.093713 | 2.763239  | -0.651949 |
| C | -3.259263 | 3.297659  | 0.525079  |
| H | -3.645446 | 3.917029  | -0.295384 |
| H | -6.204550 | 2.466662  | 1.103083  |
| H | -2.187757 | 3.476496  | 0.625764  |
| O | 4.555846  | -1.745449 | 0.194006  |
| H | 2.020605  | -0.770956 | 0.161979  |
| H | 4.340899  | -0.465530 | 0.557513  |
| H | 5.239349  | -1.806222 | -0.483422 |
| H | 0.641365  | -4.781590 | -0.608798 |
| H | 3.528819  | 2.709895  | -1.043742 |
| H | -1.701504 | -3.969224 | -0.616635 |
| H | -3.761564 | 3.624560  | 1.444829  |
| H | -0.311799 | 0.033981  | 0.155427  |
| H | -3.291699 | -2.297391 | -0.428726 |
| O | 5.385709  | 2.358446  | -0.290211 |
| C | 4.576272  | 3.071188  | -1.046644 |
| O | 4.914468  | 4.039900  | -1.703428 |
| O | 4.140043  | 0.536961  | 0.859096  |
| C | 4.127726  | 0.664545  | 2.267183  |
| H | 4.879942  | 1.581675  | 0.175263  |
| H | 5.043832  | 0.259635  | 2.722026  |
| H | 3.266517  | 0.135836  | 2.701901  |
| H | 4.048283  | 1.725285  | 2.532488  |

**A-form**

|   |           |          |           |
|---|-----------|----------|-----------|
| C | 0.844014  | 1.145842 | 0.179801  |
| C | 1.507627  | 2.241400 | -0.485216 |
| C | 0.655349  | 3.135595 | -1.224773 |
| C | -0.706544 | 2.945926 | -1.282368 |
| C | -1.355954 | 1.861393 | -0.619587 |
| C | -0.520453 | 0.967312 | 0.114998  |

|   |           |           |           |
|---|-----------|-----------|-----------|
| O | 2.775912  | 2.426353  | -0.433909 |
| H | 3.743094  | 1.542107  | 0.327830  |
| C | -2.769607 | 1.737796  | -0.728278 |
| C | -3.653183 | 0.815759  | -0.208065 |
| C | -5.096886 | 0.876275  | -0.456578 |
| N | -3.363110 | -0.292975 | 0.605936  |
| N | -5.585285 | -0.243584 | 0.251256  |
| C | -4.499779 | -0.878947 | 0.849733  |
| O | -5.809175 | 1.656006  | -1.100962 |
| C | -6.982163 | -0.610037 | 0.300163  |
| H | -7.521550 | 0.127072  | -0.300205 |
| H | -7.371782 | -0.588301 | 1.325175  |
| C | -4.664846 | -2.108464 | 1.681288  |
| H | -5.317909 | -1.930481 | 2.545611  |
| H | -7.153937 | -1.607745 | -0.121529 |
| H | -3.682114 | -2.417547 | 2.041625  |
| O | 4.434377  | 0.958820  | 0.825013  |
| H | 1.459282  | 0.449230  | 0.744207  |
| H | 4.647750  | -0.544856 | 0.258901  |
| H | 4.264816  | 1.076275  | 1.766309  |
| H | 1.130724  | 3.967919  | -1.736512 |
| H | 5.701307  | -3.664721 | 1.530457  |
| H | -1.320030 | 3.643297  | -1.851602 |
| H | -5.104372 | -2.933133 | 1.105114  |
| H | -0.986979 | 0.132930  | 0.627612  |
| H | -3.262885 | 2.501867  | -1.329634 |
| O | 6.921296  | -2.834759 | 0.122086  |
| C | 6.704361  | -3.738346 | 1.068791  |
| O | 7.514486  | -4.575905 | 1.411471  |
| O | 4.741433  | -1.458349 | -0.146948 |
| C | 4.070835  | -1.477544 | -1.405902 |
| H | 6.103934  | -2.248398 | 0.002909  |
| H | 4.542815  | -0.794071 | -2.123243 |
| H | 3.018087  | -1.196260 | -1.290242 |
| H | 4.124868  | -2.497062 | -1.798802 |

## 2. the proton transfer reaction for cluster 1c

### N-form

|   |           |          |          |
|---|-----------|----------|----------|
| C | 2.087584  | 1.224616 | 1.053461 |
| C | 2.478270  | 2.577910 | 1.049207 |
| C | 1.492918  | 3.575689 | 1.179276 |
| C | 0.156474  | 3.219319 | 1.308461 |
| C | -0.255277 | 1.865116 | 1.312898 |

|   |           |           |           |
|---|-----------|-----------|-----------|
| C | 0.753246  | 0.878060  | 1.184652  |
| O | 3.765962  | 2.960108  | 0.926168  |
| C | -1.660719 | 1.548878  | 1.444808  |
| C | -2.266513 | 0.326373  | 1.431794  |
| C | -3.725170 | 0.118855  | 1.602438  |
| N | -1.640872 | -0.917134 | 1.270993  |
| N | -3.849149 | -1.276636 | 1.535482  |
| C | -2.571399 | -1.820597 | 1.336703  |
| O | -4.657133 | 0.907222  | 1.768957  |
| C | -5.107870 | -1.979458 | 1.656339  |
| C | -2.336750 | -3.287866 | 1.218209  |
| H | 2.832417  | 0.444459  | 0.947409  |
| H | 1.800078  | 4.617177  | 1.175999  |
| H | -0.594910 | 4.000285  | 1.407179  |
| H | 0.471953  | -0.167114 | 1.188622  |
| H | 4.372801  | 2.170827  | 0.879420  |
| H | -2.338274 | 2.392138  | 1.573551  |
| H | -5.884124 | -1.223489 | 1.797287  |
| H | -5.106264 | -2.656737 | 2.517771  |
| H | -5.331000 | -2.558595 | 0.753219  |
| H | -2.655905 | -3.809431 | 2.130037  |
| H | -1.269799 | -3.477305 | 1.053553  |
| H | -2.911452 | -3.711448 | 0.384176  |
| O | 5.449680  | 0.853545  | 0.898730  |
| H | 5.133620  | 0.009210  | 0.437949  |
| H | 5.693880  | 0.580923  | 1.791232  |
| C | 1.414231  | -2.520466 | -1.124230 |
| O | 2.909684  | -2.801743 | 0.754654  |
| C | 1.787348  | -3.150311 | 0.233406  |
| O | 0.968944  | -3.945790 | 0.738062  |
| H | 1.126510  | -3.311751 | -1.825229 |
| H | 2.225230  | -1.924016 | -1.551599 |
| H | 0.539067  | -1.876391 | -0.982734 |
| O | 4.617833  | -1.313316 | -0.285133 |
| C | 5.565588  | -2.115643 | -0.957039 |
| H | 3.862453  | -1.926111 | 0.131867  |
| H | 6.344488  | -1.467638 | -1.377867 |
| H | 5.102419  | -2.675273 | -1.783609 |
| H | 6.044744  | -2.842548 | -0.282734 |

**TS**

|   |           |          |          |
|---|-----------|----------|----------|
| C | -0.911279 | 0.996315 | 1.319920 |
| C | -1.271482 | 2.317032 | 1.697522 |
| C | -0.443049 | 3.388838 | 1.283996 |

|   |           |           |           |
|---|-----------|-----------|-----------|
| C | 0.692420  | 3.147517  | 0.532746  |
| C | 1.068267  | 1.834769  | 0.146498  |
| C | 0.227473  | 0.769033  | 0.565588  |
| O | -2.346231 | 2.600062  | 2.420806  |
| C | 2.260654  | 1.667931  | -0.636559 |
| C | 2.849985  | 0.545023  | -1.152724 |
| C | 4.092520  | 0.590813  | -1.948250 |
| N | 2.416138  | -0.786929 | -1.043201 |
| N | 4.311337  | -0.762990 | -2.264792 |
| C | 3.279165  | -1.508859 | -1.694827 |
| O | 4.822428  | 1.520073  | -2.298997 |
| C | 5.430715  | -1.232227 | -3.051949 |
| C | 3.206488  | -2.992324 | -1.842991 |
| H | -1.538778 | 0.162637  | 1.624247  |
| H | -0.723839 | 4.396377  | 1.575401  |
| H | 1.317733  | 3.983700  | 0.225896  |
| H | 0.491003  | -0.243407 | 0.282554  |
| H | -2.911087 | 1.761836  | 2.708105  |
| H | 2.801115  | 2.584674  | -0.871893 |
| H | 6.025021  | -0.353047 | -3.312316 |
| H | 5.097327  | -1.722828 | -3.973735 |
| H | 6.056766  | -1.930649 | -2.484843 |
| H | 3.141982  | -3.288820 | -2.897369 |
| H | 2.317960  | -3.350953 | -1.321370 |
| H | 4.090461  | -3.483988 | -1.417658 |
| O | -3.724048 | 0.651570  | 3.175068  |
| H | -4.672207 | 0.760076  | 3.039141  |
| H | -3.434202 | -0.432632 | 2.896398  |
| C | -3.904986 | -2.343699 | -0.465046 |
| O | -4.858928 | -3.046554 | 1.646746  |
| C | -4.892217 | -3.189277 | 0.333709  |
| O | -5.688673 | -3.937483 | -0.224472 |
| H | -3.814814 | -2.745879 | -1.475531 |
| H | -2.929532 | -2.291127 | 0.024930  |
| H | -4.283213 | -1.316494 | -0.527918 |
| H | -4.085228 | -2.403699 | 2.018483  |
| O | -3.071795 | -1.602070 | 2.578769  |
| C | -2.400692 | -2.246224 | 3.635459  |
| H | -2.986813 | -2.239361 | 4.571061  |
| H | -1.433136 | -1.762643 | 3.847165  |
| H | -2.197727 | -3.297600 | 3.379386  |

**A-form**

|   |           |           |           |
|---|-----------|-----------|-----------|
| C | -0.066136 | -0.356128 | -1.411188 |
|---|-----------|-----------|-----------|

|   |           |           |           |
|---|-----------|-----------|-----------|
| C | 0.489007  | -0.254290 | -2.738612 |
| C | 1.907078  | -0.019025 | -2.812316 |
| C | 2.673896  | 0.103071  | -1.675799 |
| C | 2.118199  | 0.002992  | -0.365201 |
| C | 0.712399  | -0.232848 | -0.281718 |
| O | -0.220318 | -0.361616 | -3.802723 |
| C | 2.981408  | 0.140504  | 0.757637  |
| C | 2.738249  | 0.089220  | 2.114295  |
| C | 3.794877  | 0.261666  | 3.115875  |
| N | 1.508680  | -0.124259 | 2.761081  |
| N | 3.095558  | 0.134594  | 4.335776  |
| C | 1.753475  | -0.091789 | 4.039120  |
| O | 5.011879  | 0.469234  | 3.031010  |
| C | 3.726417  | 0.233186  | 5.631907  |
| C | 0.728268  | -0.275017 | 5.109644  |
| H | -1.133983 | -0.539370 | -1.322071 |
| H | 2.349210  | 0.061269  | -3.801692 |
| H | 3.744393  | 0.282230  | -1.769443 |
| H | 0.263470  | -0.315151 | 0.702249  |
| H | 4.031131  | 0.319649  | 0.523411  |
| H | 4.787466  | 0.424008  | 5.451534  |
| H | 3.624209  | -0.696632 | 6.204614  |
| H | 3.311098  | 1.058636  | 6.222689  |
| H | 0.954829  | -1.140403 | 5.746139  |
| H | -0.242564 | -0.432753 | 4.636680  |
| H | 0.662975  | 0.603282  | 5.765042  |
| O | -2.714794 | -0.807130 | -3.918051 |
| H | -1.702643 | -0.616054 | -3.817108 |
| H | -2.793374 | -1.535794 | -4.543091 |
| O | -4.456577 | -0.479332 | -1.990702 |
| C | -4.646192 | 0.926053  | -1.865852 |
| H | -3.786106 | -0.653883 | -2.715705 |
| H | -5.003827 | 1.370604  | -2.804086 |
| H | -3.712832 | 1.421786  | -1.572334 |
| H | -5.395274 | 1.096051  | -1.086736 |
| C | -5.126473 | -3.450238 | -0.751959 |
| O | -6.654090 | -1.922352 | -1.861805 |
| C | -6.530803 | -3.081245 | -1.202083 |
| O | -7.498217 | -3.794193 | -1.001554 |
| H | -5.175985 | -4.312080 | -0.085938 |
| H | -4.631727 | -2.610141 | -0.256789 |
| H | -4.516038 | -3.706844 | -1.625235 |
| H | -5.790735 | -1.413082 | -1.930512 |



### 3. the proton transfer reaction for cluster 1d

#### N-form

|   |           |           |           |
|---|-----------|-----------|-----------|
| C | -2.513669 | 1.491767  | 0.198566  |
| C | -3.298954 | 2.645935  | 0.013298  |
| C | -2.664176 | 3.896906  | -0.101203 |
| C | -1.277536 | 3.977162  | -0.069610 |
| C | -0.469411 | 2.825790  | 0.085207  |
| C | -1.131640 | 1.581915  | 0.229753  |
| O | -4.646279 | 2.598539  | -0.061987 |
| C | 0.971137  | 2.954166  | 0.030104  |
| C | 1.921616  | 1.981826  | 0.143704  |
| C | 3.367410  | 2.205513  | -0.091939 |
| N | 1.710986  | 0.624856  | 0.405979  |
| N | 3.909109  | 0.912155  | 0.007432  |
| C | 2.866062  | 0.027776  | 0.316539  |
| O | 4.012164  | 3.223858  | -0.341167 |
| C | 5.317739  | 0.648122  | -0.217209 |
| C | 2.976304  | -1.463433 | 0.469608  |
| C | 2.998207  | -2.186383 | -0.912114 |
| C | 4.092261  | -1.970617 | 1.396658  |
| O | 2.691123  | -3.553227 | -0.777104 |
| H | -2.991241 | 0.523425  | 0.303041  |
| H | -3.276255 | 4.783482  | -0.236278 |
| H | -0.798476 | 4.947644  | -0.181535 |
| H | -0.538510 | 0.685032  | 0.350482  |
| H | -4.962349 | 1.659904  | -0.151497 |
| H | 1.361451  | 3.950887  | -0.171590 |
| H | 5.742682  | 1.554654  | -0.654770 |
| H | 5.845060  | 0.428782  | 0.717328  |
| H | 5.453293  | -0.187135 | -0.909067 |
| H | 2.015830  | -1.737521 | 0.915603  |
| H | 4.001292  | -2.105965 | -1.357825 |
| H | 2.284614  | -1.688832 | -1.582141 |
| H | 5.092086  | -1.792990 | 0.987354  |
| H | 4.037945  | -1.503474 | 2.386569  |
| H | 3.974141  | -3.051202 | 1.515294  |
| H | 1.701068  | -3.640127 | -0.853944 |
| O | -5.516623 | 0.077401  | -0.537594 |
| H | -5.592265 | -0.042787 | -1.491908 |
| H | -4.967623 | -0.701135 | -0.215523 |
| C | -0.740442 | -2.997796 | 1.059218  |
| O | 0.031636  | -3.526653 | -1.153337 |
| C | -0.951280 | -3.163410 | -0.456796 |
| O | -2.109774 | -2.899539 | -0.914421 |

|   |           |           |           |
|---|-----------|-----------|-----------|
| H | -0.492673 | -1.950846 | 1.271852  |
| H | -1.649908 | -3.238800 | 1.617405  |
| H | 0.085828  | -3.622872 | 1.408703  |
| O | -4.096230 | -1.954263 | 0.350486  |
| C | -4.832360 | -3.034313 | 0.892480  |
| H | -3.261590 | -2.319250 | -0.139749 |
| H | -5.742397 | -2.637359 | 1.356519  |
| H | -4.256318 | -3.564938 | 1.664824  |
| H | -5.122102 | -3.762144 | 0.120398  |

**TS**

|   |           |           |           |
|---|-----------|-----------|-----------|
| C | 2.932342  | -0.023419 | 0.329670  |
| N | 1.768073  | 0.557273  | 0.411557  |
| C | 1.959677  | 1.918488  | 0.143373  |
| C | 3.396363  | 2.161001  | -0.090135 |
| N | 3.960519  | 0.872538  | 0.021204  |
| C | 0.994074  | 2.881984  | 0.018068  |
| C | -0.438455 | 2.751899  | 0.070667  |
| C | -1.258226 | 3.886791  | -0.154837 |
| C | -2.639726 | 3.790280  | -0.202955 |
| C | -3.278335 | 2.537124  | -0.035951 |
| C | -2.472997 | 1.402228  | 0.230557  |
| C | -1.097143 | 1.511677  | 0.277657  |
| O | -4.600506 | 2.462562  | -0.136000 |
| O | 4.034039  | 3.184336  | -0.345657 |
| C | 5.373770  | 0.635148  | -0.197441 |
| C | 3.055748  | -1.517306 | 0.481978  |
| C | 4.205591  | -2.025924 | 1.365502  |
| H | 1.381345  | 3.877468  | -0.197496 |
| H | -0.785541 | 4.855060  | -0.310438 |
| H | -3.258300 | 4.663145  | -0.393612 |
| H | -2.948287 | 0.439507  | 0.377619  |
| H | -0.494202 | 0.632508  | 0.458633  |
| H | -4.934840 | 1.472221  | -0.184487 |
| H | 5.787095  | 1.559881  | -0.606260 |
| H | 5.897838  | 0.399108  | 0.735001  |
| H | 5.532255  | -0.178716 | -0.912100 |
| H | 2.114566  | -1.793702 | 0.967488  |
| H | 4.192215  | -1.551726 | 2.353173  |
| H | 5.188156  | -1.852569 | 0.915459  |
| H | 4.090764  | -3.105549 | 1.498098  |
| C | 3.024712  | -2.232109 | -0.898844 |
| O | 2.705750  | -3.603877 | -0.768143 |
| H | 2.302589  | -1.723512 | -1.548965 |

|   |           |           |           |
|---|-----------|-----------|-----------|
| H | 4.013965  | -2.171532 | -1.375487 |
| H | 1.727414  | -3.683091 | -0.772402 |
| O | -0.126848 | -3.563161 | -0.964740 |
| C | -1.098805 | -3.026414 | -0.424360 |
| O | -2.260416 | -2.944944 | -1.035135 |
| C | -0.985467 | -2.437887 | 0.974160  |
| H | -0.273818 | -1.607844 | 0.946573  |
| H | -1.943144 | -2.074752 | 1.353025  |
| H | -0.576775 | -3.200359 | 1.643751  |
| O | -4.129926 | -1.843780 | 0.237959  |
| C | -4.949091 | -2.727930 | 0.966988  |
| H | -3.033636 | -2.465512 | -0.491157 |
| H | -5.621045 | -2.172869 | 1.638844  |
| H | -4.338152 | -3.403995 | 1.585929  |
| H | -5.576215 | -3.357956 | 0.311363  |
| O | -5.411129 | 0.112546  | -0.342154 |
| H | -5.820783 | -0.003844 | -1.207772 |
| H | -4.762910 | -0.865217 | -0.090796 |

**A-form**

|   |           |           |           |
|---|-----------|-----------|-----------|
| C | -2.723086 | -1.094050 | -1.086361 |
| C | -3.795165 | -1.881013 | -0.531214 |
| C | -3.395065 | -3.076671 | 0.164834  |
| C | -2.064525 | -3.382597 | 0.362352  |
| C | -1.012232 | -2.543861 | -0.110067 |
| C | -1.400319 | -1.404725 | -0.873876 |
| O | -5.027401 | -1.534126 | -0.639214 |
| C | 0.338945  | -2.834415 | 0.239861  |
| C | 1.481421  | -2.079190 | 0.079173  |
| C | 2.800172  | -2.493772 | 0.564470  |
| N | 1.578667  | -0.793912 | -0.474249 |
| N | 3.617180  | -1.377315 | 0.271006  |
| C | 2.820627  | -0.411481 | -0.346863 |
| O | 3.205266  | -3.525608 | 1.112546  |
| C | 5.025311  | -1.352658 | 0.610549  |
| C | 3.261533  | 0.968633  | -0.762077 |
| C | 3.416711  | 1.917695  | 0.456460  |
| C | 4.487972  | 1.026943  | -1.688784 |
| O | 3.434991  | 3.281220  | 0.064880  |
| H | -2.992363 | -0.216010 | -1.667056 |
| H | -4.181938 | -3.712621 | 0.561621  |
| H | -1.799805 | -4.276935 | 0.925458  |
| H | -0.619832 | -0.774097 | -1.280857 |
| H | 0.509721  | -3.776972 | 0.760184  |

|   |           |           |           |
|---|-----------|-----------|-----------|
| H | 5.662262  | -1.449250 | -0.276211 |
| H | 5.202934  | -2.211784 | 1.262412  |
| H | 5.291630  | -0.434403 | 1.141761  |
| H | 2.401669  | 1.347198  | -1.324454 |
| H | 4.365733  | 1.720996  | 0.972464  |
| H | 2.602655  | 1.728124  | 1.168224  |
| H | 5.404097  | 0.699120  | -1.187037 |
| H | 4.639967  | 2.061185  | -2.010986 |
| H | 4.342900  | 0.402363  | -2.576878 |
| H | 2.511023  | 3.597482  | 0.042869  |
| O | -5.412983 | 1.008762  | -0.795663 |
| H | -5.285003 | -0.009755 | -0.775706 |
| H | -5.611963 | 1.241996  | -1.708920 |
| C | -0.611651 | 2.296332  | -0.901366 |
| O | 0.646238  | 3.965888  | 0.283338  |
| C | -0.427948 | 3.397478  | 0.121919  |
| O | -1.480198 | 3.741619  | 0.860494  |
| H | -0.045493 | 1.413293  | -0.585076 |
| H | -0.190808 | 2.631151  | -1.853501 |
| H | -1.655308 | 2.008442  | -1.034080 |
| H | -2.293222 | 3.176648  | 0.701124  |
| O | -3.658944 | 2.263959  | 0.811615  |
| C | -3.691729 | 1.427679  | 1.969874  |
| H | -4.271110 | 1.875062  | 0.132131  |
| H | -3.348924 | 0.412587  | 1.738689  |
| H | -3.025192 | 1.870004  | 2.715366  |
| H | -4.706132 | 1.379092  | 2.383906  |

#### 4. the proton transfer reaction for cluster 1e

##### N-form

|   |           |           |           |
|---|-----------|-----------|-----------|
| C | 1.485529  | 0.107749  | 0.199546  |
| C | 2.724227  | -0.529525 | 0.020458  |
| C | 2.777038  | -1.929116 | -0.077623 |
| C | 1.599677  | -2.668922 | -0.036256 |
| C | 0.338424  | -2.047691 | 0.109396  |
| C | 0.317703  | -0.638258 | 0.238950  |
| O | 3.884277  | 0.179297  | -0.065158 |
| C | -0.865115 | -2.855542 | 0.058335  |
| C | -2.162745 | -2.453178 | 0.165312  |
| C | -3.328990 | -3.341066 | -0.069644 |
| N | -2.625273 | -1.159229 | 0.418364  |
| N | -4.420716 | -2.460623 | 0.018403  |
| C | -3.925315 | -1.185401 | 0.323187  |
| O | -3.407770 | -4.543946 | -0.310577 |

|   |           |           |           |
|---|-----------|-----------|-----------|
| C | -5.785581 | -2.900948 | -0.203684 |
| C | -4.729882 | 0.075949  | 0.464156  |
| C | -5.066559 | 0.700894  | -0.925350 |
| C | -5.968275 | -0.001364 | 1.370560  |
| O | -5.434354 | 2.053185  | -0.798827 |
| H | 1.436220  | 1.187014  | 0.294682  |
| H | 3.737487  | -2.419112 | -0.205996 |
| H | 1.649867  | -3.751025 | -0.134045 |
| H | -0.634099 | -0.137055 | 0.354494  |
| H | 3.704933  | 1.157355  | -0.211421 |
| H | -0.728943 | -3.918411 | -0.135759 |
| H | -5.727525 | -3.904349 | -0.631916 |
| H | -6.353481 | -2.949686 | 0.731265  |
| H | -6.301292 | -2.237139 | -0.902153 |
| H | -4.019615 | 0.771217  | 0.920975  |
| H | -5.909358 | 0.159291  | -1.380742 |
| H | -4.193888 | 0.592637  | -1.582688 |
| H | -6.761577 | -0.625331 | 0.946659  |
| H | -5.718294 | -0.389944 | 2.364282  |
| H | -6.371649 | 1.008528  | 1.484353  |
| H | -4.599823 | 2.591110  | -0.881445 |
| O | 3.465962  | 2.730743  | -0.600956 |
| H | 3.464747  | 2.890170  | -1.552602 |
| H | 2.619832  | 3.162569  | -0.252062 |
| C | -2.167880 | 3.205507  | 1.043549  |
| O | -3.059397 | 3.251321  | -1.186657 |
| C | -2.033437 | 3.404804  | -0.476462 |
| O | -0.876020 | 3.694297  | -0.924521 |
| H | -1.863213 | 2.183241  | 1.297660  |
| H | -1.513833 | 3.888375  | 1.593980  |
| H | -3.203151 | 3.345676  | 1.365418  |
| O | 1.298212  | 3.811655  | 0.351879  |
| C | 1.432859  | 5.101416  | 0.921279  |
| H | 0.386605  | 3.742961  | -0.143312 |
| H | 2.425547  | 5.179306  | 1.378596  |
| H | 0.679538  | 5.272469  | 1.703639  |
| H | 1.331285  | 5.894440  | 0.166267  |
| C | 8.599390  | -1.531686 | -0.604974 |
| N | 8.676170  | -1.229085 | 0.737507  |
| C | 7.346737  | -1.236085 | -1.095042 |
| C | 7.481080  | -0.756787 | 1.049124  |
| N | 6.639663  | -0.739987 | -0.022669 |
| H | 9.444785  | -1.942257 | -1.139626 |
| H | 6.907899  | -1.329014 | -2.076790 |

|   |          |           |           |
|---|----------|-----------|-----------|
| H | 7.174723 | -0.415039 | 2.027869  |
| H | 5.666785 | -0.422446 | -0.031177 |

**TS**

|   |           |           |           |
|---|-----------|-----------|-----------|
| C | 1.439974  | 0.112033  | 0.336932  |
| C | 2.675846  | -0.536312 | 0.125517  |
| C | 2.693270  | -1.941007 | -0.005719 |
| C | 1.505411  | -2.660343 | 0.025780  |
| C | 0.253695  | -2.021556 | 0.195684  |
| C | 0.263497  | -0.614815 | 0.367517  |
| O | 3.824208  | 0.155077  | 0.043156  |
| C | -0.961515 | -2.798765 | 0.121575  |
| C | -2.259145 | -2.377234 | 0.199460  |
| C | -3.425226 | -3.249648 | -0.059348 |
| N | -2.712768 | -1.073947 | 0.433424  |
| N | -4.512491 | -2.355226 | -0.000789 |
| C | -4.010227 | -1.086362 | 0.306852  |
| O | -3.518034 | -4.453255 | -0.297561 |
| C | -5.874335 | -2.784313 | -0.256839 |
| C | -4.800486 | 0.190556  | 0.413587  |
| C | -5.046688 | 0.822007  | -0.987926 |
| C | -6.086918 | 0.136891  | 1.252081  |
| O | -5.376665 | 2.192487  | -0.885688 |
| H | 1.415475  | 1.189196  | 0.459279  |
| H | 3.643500  | -2.445572 | -0.153367 |
| H | 1.535076  | -3.740568 | -0.100917 |
| H | -0.679428 | -0.104678 | 0.508125  |
| H | 3.666070  | 1.210486  | -0.086380 |
| H | -0.843785 | -3.864234 | -0.072125 |
| H | -5.812872 | -3.800754 | -0.652875 |
| H | -6.475426 | -2.799138 | 0.658315  |
| H | -6.358871 | -2.137730 | -0.993646 |
| H | -4.103339 | 0.870468  | 0.912755  |
| H | -5.887418 | 0.317576  | -1.484267 |
| H | -4.150708 | 0.681243  | -1.605780 |
| H | -6.870017 | -0.464931 | 0.780522  |
| H | -5.898277 | -0.267106 | 2.252925  |
| H | -6.474216 | 1.154117  | 1.357178  |
| H | -4.533982 | 2.696818  | -0.880031 |
| O | 3.498606  | 2.583349  | -0.317874 |
| H | 3.752385  | 2.826829  | -1.215960 |
| H | 2.490200  | 3.136689  | -0.057227 |
| C | -1.645336 | 2.906875  | 0.990581  |
| O | -2.823798 | 3.354983  | -1.051087 |

|   |           |           |           |
|---|-----------|-----------|-----------|
| C | -1.738838 | 3.363305  | -0.459997 |
| O | -0.639780 | 3.761709  | -1.051501 |
| H | -1.921517 | 1.848992  | 1.043209  |
| H | -0.644149 | 3.034034  | 1.405340  |
| H | -2.375067 | 3.466668  | 1.583623  |
| O | 1.445634  | 3.709851  | 0.278572  |
| C | 1.715952  | 4.906872  | 0.972056  |
| H | 0.260355  | 3.724939  | -0.458899 |
| H | 2.657168  | 4.823185  | 1.534610  |
| H | 0.914029  | 5.132145  | 1.692842  |
| H | 1.804550  | 5.772296  | 0.293218  |
| C | 8.401063  | -1.666337 | -0.796681 |
| N | 8.585754  | -1.367327 | 0.535953  |
| C | 7.124768  | -1.331539 | -1.193089 |
| C | 7.430350  | -0.858481 | 0.932532  |
| N | 6.513592  | -0.814811 | -0.073488 |
| H | 9.191829  | -2.102205 | -1.391766 |
| H | 6.612227  | -1.409548 | -2.139880 |
| H | 7.207452  | -0.507155 | 1.930277  |
| H | 5.548119  | -0.467445 | -0.012254 |

**A-form**

|   |           |           |           |
|---|-----------|-----------|-----------|
| C | -1.576623 | -0.083569 | -1.039352 |
| C | -2.823725 | -0.512801 | -0.482642 |
| C | -2.803420 | -1.740194 | 0.252330  |
| C | -1.620578 | -2.424008 | 0.467467  |
| C | -0.372981 | -1.950948 | -0.022926 |
| C | -0.402165 | -0.767591 | -0.810757 |
| O | -3.907823 | 0.191325  | -0.635736 |
| C | 0.833570  | -2.636562 | 0.331774  |
| C | 2.144878  | -2.272267 | 0.146688  |
| C | 3.280240  | -3.065900 | 0.639296  |
| N | 2.630877  | -1.097633 | -0.446805 |
| N | 4.397787  | -2.268902 | 0.308002  |
| C | 3.931501  | -1.120871 | -0.336339 |
| O | 3.346481  | -4.154927 | 1.215071  |
| C | 5.750000  | -2.677375 | 0.634251  |
| C | 4.778146  | 0.036024  | -0.799642 |
| C | 5.258055  | 0.914203  | 0.387783  |
| C | 5.934787  | -0.323982 | -1.747910 |
| O | 5.694052  | 2.191155  | -0.046289 |
| H | -1.576797 | 0.821166  | -1.640452 |
| H | -3.738517 | -2.109947 | 0.663966  |
| H | -1.635462 | -3.339897 | 1.056079  |

|   |           |           |           |
|---|-----------|-----------|-----------|
| H | 0.529465  | -0.404816 | -1.226110 |
| H | 0.711964  | -3.574769 | 0.872812  |
| H | 6.309624  | -2.983315 | -0.256457 |
| H | 5.662127  | -3.536478 | 1.303803  |
| H | 6.296380  | -1.878148 | 1.142600  |
| H | 4.070965  | 0.656412  | -1.359683 |
| H | 6.110623  | 0.439480  | 0.890477  |
| H | 4.445859  | 1.008070  | 1.120659  |
| H | 6.712346  | -0.913658 | -1.251970 |
| H | 6.398879  | 0.599609  | -2.105453 |
| H | 5.575516  | -0.890832 | -2.613497 |
| H | 4.914305  | 2.778923  | -0.071328 |
| O | -3.461342 | 2.765706  | -0.729416 |
| H | -3.659470 | 1.771664  | -0.739966 |
| H | -3.741663 | 3.116458  | -1.581438 |
| C | 1.492619  | 2.510927  | -0.946766 |
| O | 3.255764  | 3.695002  | 0.177682  |
| C | 2.051825  | 3.509476  | 0.045643  |
| O | 1.187193  | 4.201300  | 0.784975  |
| H | 1.824743  | 1.504758  | -0.670492 |
| H | 1.906903  | 2.734616  | -1.934376 |
| H | 0.402886  | 2.519150  | -0.991814 |
| H | 0.233820  | 3.929174  | 0.651257  |
| O | -1.362204 | 3.505566  | 0.804975  |
| C | -1.664898 | 2.824992  | 2.024280  |
| H | -2.072678 | 3.294415  | 0.148420  |
| H | -1.700325 | 1.739203  | 1.876682  |
| H | -0.872953 | 3.062406  | 2.739523  |
| H | -2.624882 | 3.165279  | 2.430880  |
| C | -8.545571 | -0.770375 | 0.599103  |
| N | -8.520301 | -1.467990 | -0.588879 |
| C | -7.312094 | -0.207934 | 0.852158  |
| C | -7.281657 | -1.320768 | -1.037359 |
| N | -6.511490 | -0.569276 | -0.205380 |
| H | -9.442904 | -0.712550 | 1.200409  |
| H | -6.943770 | 0.401140  | 1.663943  |
| H | -6.895669 | -1.739492 | -1.956550 |
| H | -5.507827 | -0.315297 | -0.343085 |

## 5. the proton transfer reaction for cluster 1s

### N-form

|   |           |          |          |
|---|-----------|----------|----------|
| C | 0.014922  | 0.319012 | 0.139026 |
| C | -1.235137 | 0.951490 | 0.034971 |
| C | -1.303827 | 2.354049 | 0.005673 |



|   |           |           |           |
|---|-----------|-----------|-----------|
| C | -0.132846 | 3.103407  | 0.057719  |
| C | 1.137846  | 2.488676  | 0.131948  |
| C | 1.176478  | 1.074467  | 0.179478  |
| O | -2.391874 | 0.237294  | -0.036600 |
| C | 2.330429  | 3.313341  | 0.142816  |
| C | 3.634666  | 2.919262  | 0.131720  |
| C | 4.786927  | 3.857905  | 0.112444  |
| N | 4.114928  | 1.603561  | 0.105767  |
| N | 5.889261  | 2.993435  | 0.067634  |
| C | 5.411341  | 1.674780  | 0.063871  |
| O | 4.846023  | 5.086731  | 0.127322  |
| C | 7.264347  | 3.443281  | 0.024682  |
| C | 6.321794  | 0.496064  | 0.012191  |
| H | 0.078757  | -0.762362 | 0.194544  |
| H | -2.272435 | 2.840295  | -0.061898 |
| H | -0.196466 | 4.188932  | 0.028610  |
| H | 2.135235  | 0.576019  | 0.241165  |
| H | -2.214744 | -0.749954 | -0.124842 |
| H | 2.176972  | 4.391605  | 0.142910  |
| H | 7.245025  | 4.535042  | 0.059555  |
| H | 7.760708  | 3.122914  | -0.898095 |
| H | 7.833602  | 3.066231  | 0.881302  |
| H | 6.978415  | 0.547711  | -0.865551 |
| H | 5.729942  | -0.425353 | -0.039820 |
| H | 6.968287  | 0.461808  | 0.899096  |
| O | -1.997946 | -2.349757 | -0.333441 |
| H | -1.110669 | -2.719398 | 0.002318  |
| H | -2.097051 | -2.674239 | -1.236145 |
| O | 2.508477  | -3.315400 | -0.423015 |
| C | 3.393415  | -2.493823 | 0.007451  |
| O | 4.587759  | -2.418116 | -0.324236 |
| H | 3.024999  | -1.766074 | 0.774427  |
| O | 0.244275  | -3.209064 | 0.590489  |
| C | 0.205532  | -4.103798 | 1.684676  |
| H | 1.212732  | -3.227292 | 0.139904  |
| H | -0.805800 | -4.103108 | 2.109361  |
| H | 0.910274  | -3.803282 | 2.473815  |
| H | 0.452896  | -5.131279 | 1.378690  |
| C | -6.907620 | 1.970270  | -1.428470 |
| N | -7.235559 | 1.690706  | -0.119178 |
| C | -5.589491 | 1.654912  | -1.673312 |
| C | -6.124539 | 1.212361  | 0.415250  |
| N | -5.099419 | 1.170059  | -0.481498 |
| H | -7.634139 | 2.380121  | -2.116465 |

|   |           |          |           |
|---|-----------|----------|-----------|
| H | -4.974485 | 1.728728 | -2.557253 |
| H | -6.008915 | 0.883855 | 1.438637  |
| H | -4.145447 | 0.841329 | -0.306314 |

**TS**

|   |           |           |           |
|---|-----------|-----------|-----------|
| C | 0.134509  | 1.586361  | -0.354038 |
| C | -1.023674 | 2.092756  | 0.277175  |
| C | -1.223320 | 3.487098  | 0.328200  |
| C | -0.291156 | 4.342290  | -0.238316 |
| C | 0.874563  | 3.856197  | -0.878299 |
| C | 1.059933  | 2.450910  | -0.917637 |
| O | -1.944944 | 1.288010  | 0.831958  |
| C | 1.794823  | 4.811069  | -1.444608 |
| C | 2.973884  | 4.628197  | -2.107834 |
| C | 3.785342  | 5.757589  | -2.616320 |
| N | 3.616238  | 3.418118  | -2.420060 |
| N | 4.883801  | 5.110754  | -3.209511 |
| C | 4.708220  | 3.736138  | -3.051041 |
| O | 3.622025  | 6.975811  | -2.577057 |
| C | 5.975613  | 5.809492  | -3.854576 |
| C | 5.704031  | 2.754260  | -3.571537 |
| H | 0.283739  | 0.511871  | -0.387935 |
| H | -2.110539 | 3.876127  | 0.818113  |
| H | -0.457676 | 5.416099  | -0.191225 |
| H | 1.946120  | 2.054378  | -1.398936 |
| H | 1.516933  | 5.858564  | -1.332182 |
| H | 5.760276  | 6.877379  | -3.773084 |
| H | 6.053671  | 5.541412  | -4.914153 |
| H | 6.931905  | 5.599751  | -3.362632 |
| H | 5.823755  | 2.842657  | -4.658357 |
| H | 5.358919  | 1.747038  | -3.334322 |
| H | 6.691665  | 2.906881  | -3.119308 |
| O | -1.421455 | -1.137361 | 0.578232  |
| H | -1.722899 | 0.266294  | 0.734823  |
| H | -2.093930 | -1.686604 | 0.159201  |
| O | -0.301533 | -2.521828 | 2.253809  |
| C | -0.656808 | -2.259747 | 3.592877  |
| H | -0.920184 | -1.751476 | 1.341746  |
| H | -1.750188 | -2.224379 | 3.736887  |
| H | -0.241342 | -1.295077 | 3.919813  |
| H | -0.259105 | -3.040683 | 4.256894  |
| O | -0.348226 | -4.883835 | 1.764857  |
| C | 0.808596  | -5.387852 | 1.455883  |
| O | 1.043371  | -6.560964 | 1.172271  |

|   |           |           |           |
|---|-----------|-----------|-----------|
| H | -0.313996 | -3.710735 | 2.003063  |
| H | 1.642094  | -4.648057 | 1.460936  |
| C | -6.582137 | 2.874679  | 1.937274  |
| N | -6.203622 | 2.608214  | 3.235380  |
| C | -5.563093 | 2.564138  | 1.064448  |
| C | -4.969511 | 2.142249  | 3.141497  |
| N | -4.534485 | 2.095390  | 1.850865  |
| H | -7.561041 | 3.271255  | 1.705599  |
| H | -5.478235 | 2.629530  | -0.009606 |
| H | -4.351864 | 1.824819  | 3.969958  |
| H | -3.615209 | 1.783445  | 1.522713  |

**A-from**

|   |           |           |           |
|---|-----------|-----------|-----------|
| C | 0.341352  | 0.490533  | -0.241308 |
| C | -0.997806 | 1.001765  | -0.229050 |
| C | -1.140067 | 2.419845  | -0.102229 |
| C | -0.035345 | 3.240853  | 0.001221  |
| C | 1.292693  | 2.731600  | -0.012633 |
| C | 1.438970  | 1.320604  | -0.138025 |
| O | -2.032164 | 0.221150  | -0.327710 |
| C | 2.382549  | 3.650518  | 0.096361  |
| C | 3.741433  | 3.449442  | 0.110414  |
| C | 4.706478  | 4.553162  | 0.233496  |
| N | 4.435141  | 2.230307  | 0.016574  |
| N | 5.949262  | 3.888130  | 0.203482  |
| C | 5.701796  | 2.522921  | 0.073630  |
| O | 4.571145  | 5.775383  | 0.340853  |
| C | 7.222693  | 4.566901  | 0.296386  |
| C | 6.810472  | 1.524807  | 0.010402  |
| H | 0.476325  | -0.582929 | -0.343093 |
| H | -2.143214 | 2.836588  | -0.083150 |
| H | -0.178382 | 4.315880  | 0.097967  |
| H | 2.440173  | 0.904411  | -0.152771 |
| H | -1.920055 | -1.342731 | -0.328565 |
| H | 2.105329  | 4.701003  | 0.184724  |
| H | 7.005015  | 5.632972  | 0.398202  |
| H | 7.830194  | 4.411886  | -0.603105 |
| H | 7.794055  | 4.234620  | 1.171027  |
| H | 7.475501  | 1.712345  | -0.842233 |
| H | 6.376842  | 0.529015  | -0.094265 |
| H | 7.427916  | 1.548008  | 0.917441  |
| O | -1.911569 | -2.360787 | -0.320604 |
| H | -0.631584 | -3.176485 | 0.310791  |
| H | -2.289495 | -2.647271 | -1.159403 |

|   |           |           |           |
|---|-----------|-----------|-----------|
| O | 0.631319  | -6.145292 | 0.267271  |
| C | 1.711715  | -6.204479 | -0.504192 |
| O | 2.222004  | -7.239564 | -0.879282 |
| H | 2.114638  | -5.211871 | -0.780699 |
| O | 0.126958  | -3.638190 | 0.768182  |
| C | 0.204706  | -3.183214 | 2.117540  |
| H | 0.389418  | -5.184955 | 0.460898  |
| H | 0.380467  | -2.101882 | 2.153886  |
| H | 1.046868  | -3.693220 | 2.593672  |
| H | -0.712389 | -3.416340 | 2.673675  |
| C | -6.584732 | 1.708310  | -1.387900 |
| N | -6.866979 | 1.086395  | -0.191212 |
| C | -5.234773 | 1.636408  | -1.659871 |
| C | -5.694181 | 0.648870  | 0.244435  |
| N | -4.676181 | 0.954286  | -0.604521 |
| H | -7.362588 | 2.169148  | -1.981738 |
| H | -4.639645 | 1.998590  | -2.484767 |
| H | -5.531302 | 0.105352  | 1.164781  |
| H | -3.667191 | 0.720144  | -0.480804 |
